# Supplementary material for: Computational Analysis and Biological Activities of Oxyresveratrol Analogues, the Putative Cyclooxygenase-2 Inhibitors
Source: MDPI journal article supplement (doi:10.3390/molecules27072346), 2022-04-06
Supplement: s1 [file s1]

## Supplementary Information

# Computational Analysis and Biological Activities of Oxyresveratrol Analogues, the Putative Cyclooxygenase-2 Inhibitors

Nathjanan Jongkon <sup>1</sup>, Boonwiset Seaho <sup>2</sup>, Ngampuk Tayana <sup>3</sup>, Saisuree Prateeptongkum <sup>2</sup>, Nongnaphat Duangdee <sup>3,\*</sup> and Panichakorn Jaiyong <sup>2,\*</sup>

<sup>1</sup> Department of Social and Applied Science, College of Industrial Technology; King Mongkut's University of Technology North Bangkok, Bangkok 10800, Thailand; nathjanan.j@cit.kmutnb.ac.th

<sup>2</sup> Department of Chemistry, Faculty of Science and Technology, Thammasat University, Pathum Thani 12120, Thailand; boonwiset.seah@dome.tu.ac.th (B.S.); saisuree@tu.ac.th (S.P.)

<sup>3</sup> Drug Discovery and Development Center, Office of Advance Science and Technology, Thammasat University, Pathum Thani 12120, Thailand; ngampuk@tu.ac.th

\* Correspondence: duangde@tu.ac.th (N.D.); scpj@tu.ac.th (P.J.)

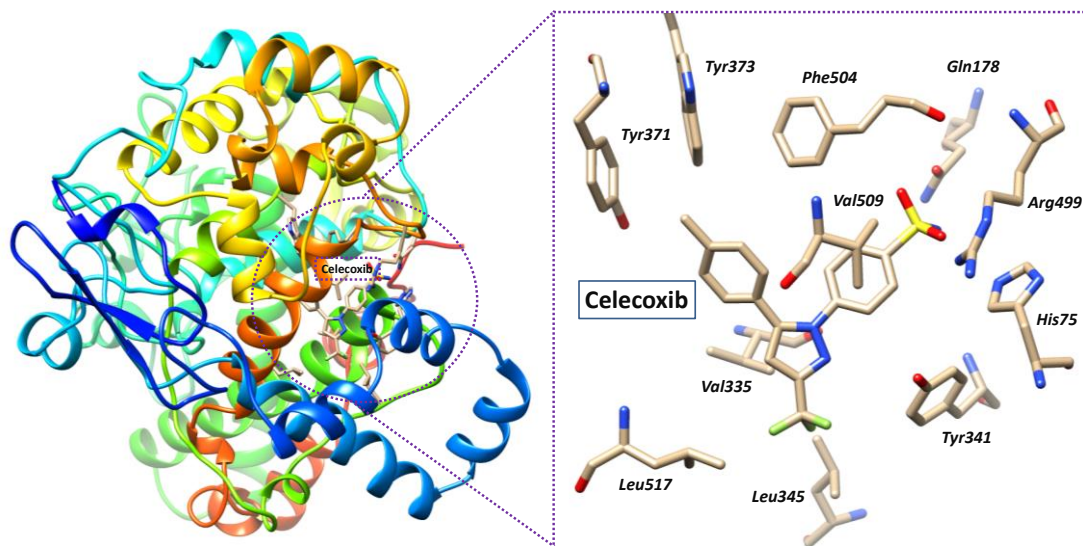

**Figure S1.** X-ray crystallographic pose of celecoxib bound to COX-2 receptor (PDB entry: 3LN1).

Right panel shows the co-crystallized celecoxib and key residues of amino acids at the catalytic site of COX-2.

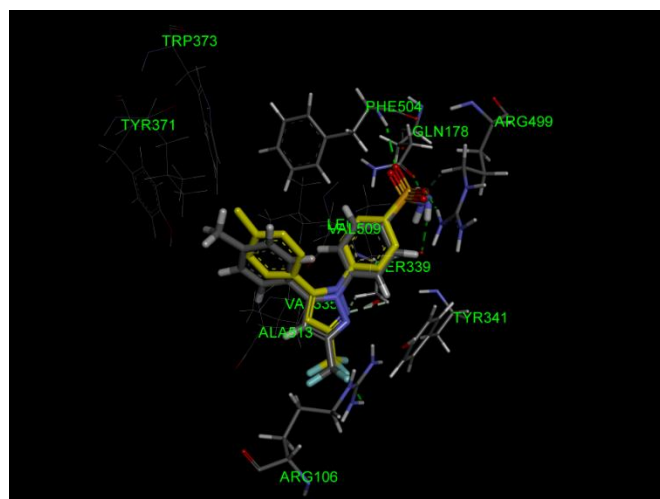

(a)

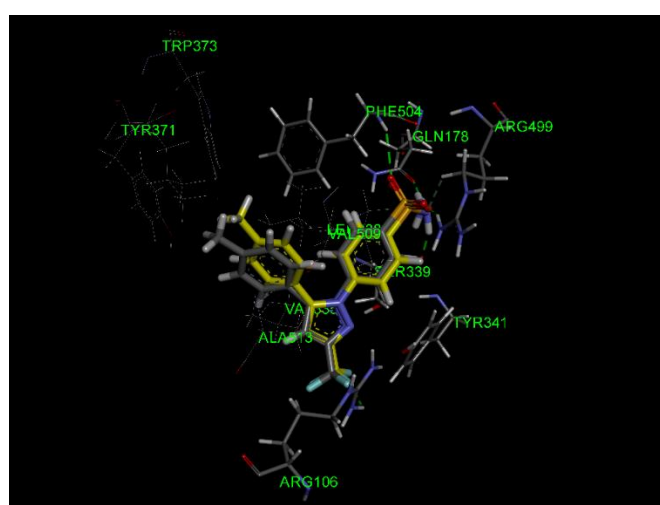

(b)

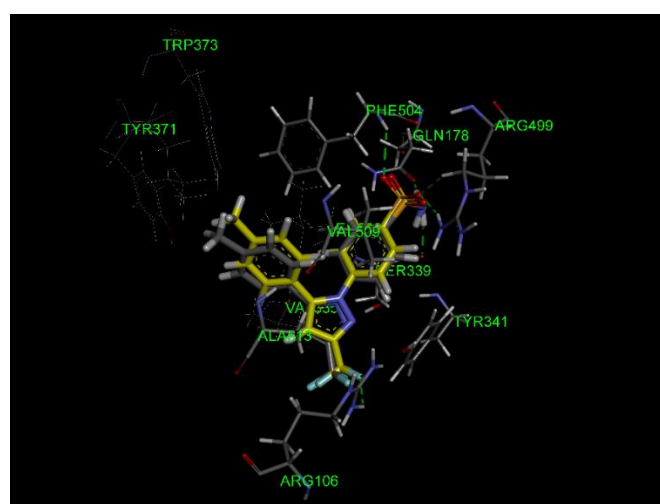

(c)

**Figure S2.** The superposition of the one ns MD structure (grey) and the best-docked poses (yellow) of celecoxib from (a) AutoDock with the RMSD value of 0.68 Å, (b) ChemPLP with the RMSD value of 0.55 Å and (c) GoldScore with the RMSD value of 0.56 Å was within 6 Å of COX-2 binding pocket. Only the amino acid residues in proximity to the binding pocket are highlighted for clarity.

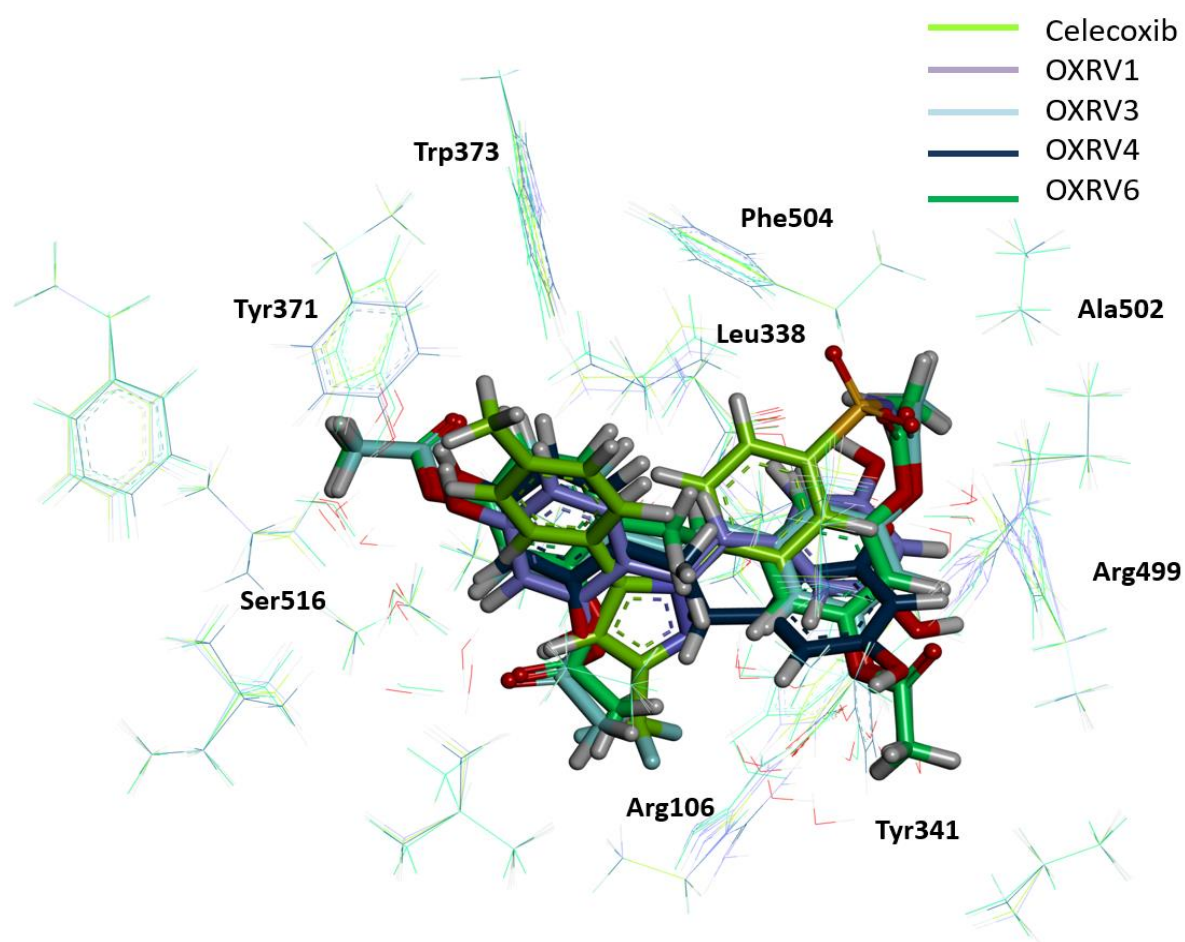

**Figure S3.** Overlay of the lowest-QM-energy poses (stick representation) of celecoxib and oxyresveratrol derivatives in catalytic pocket of COX-2.

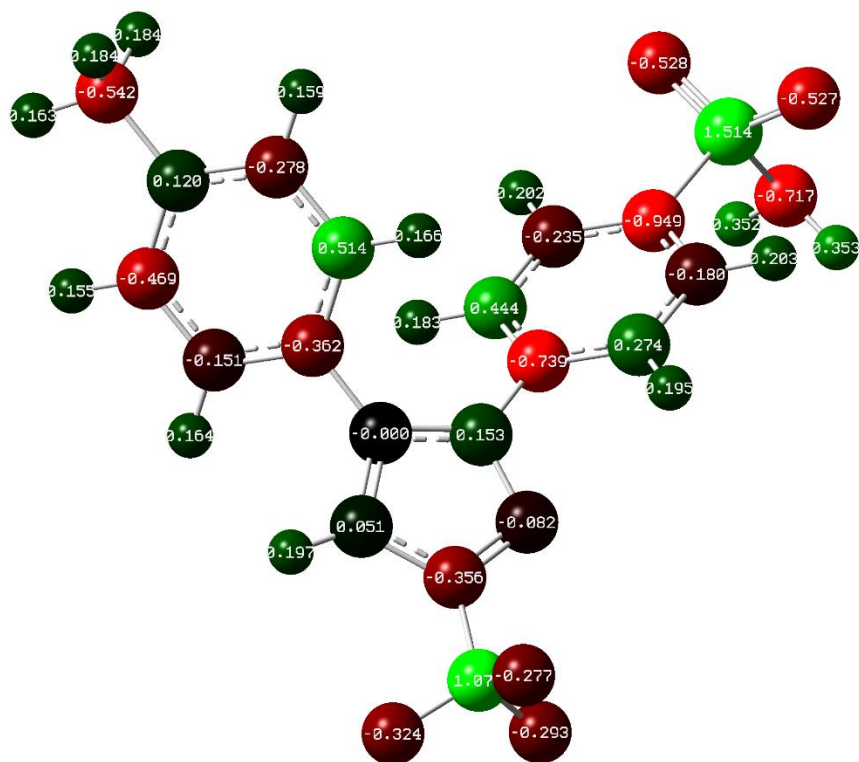

(a)

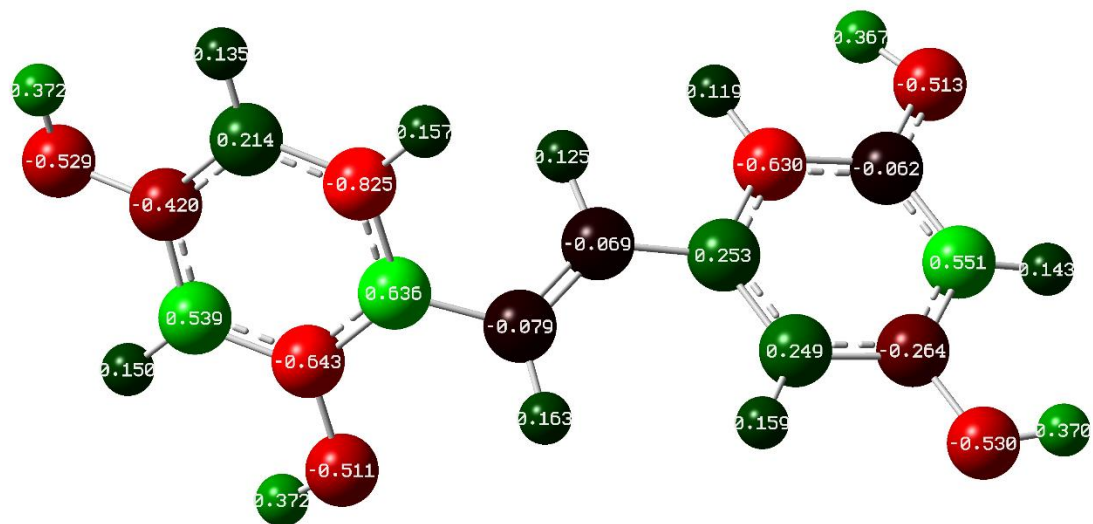

(b)

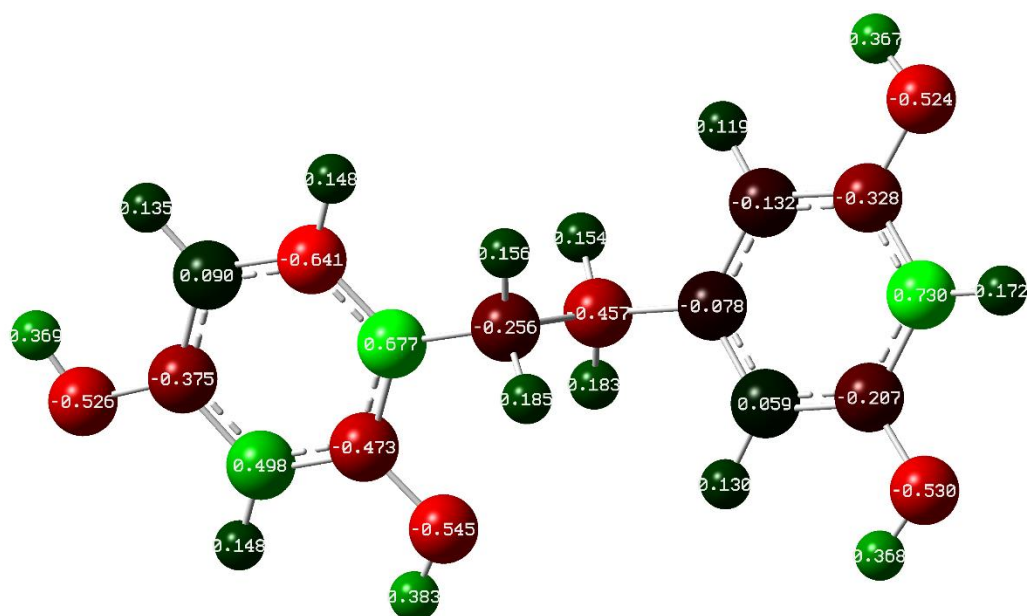

(c)

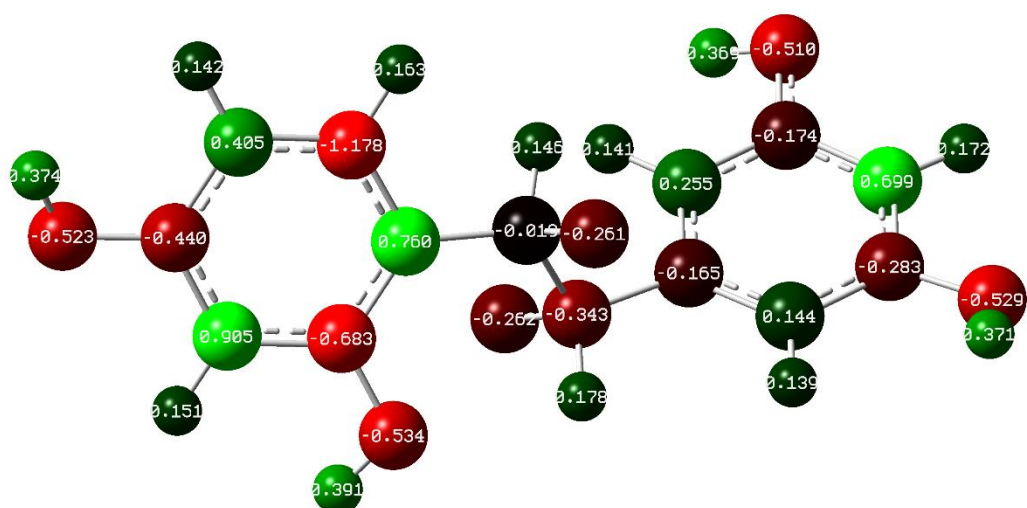

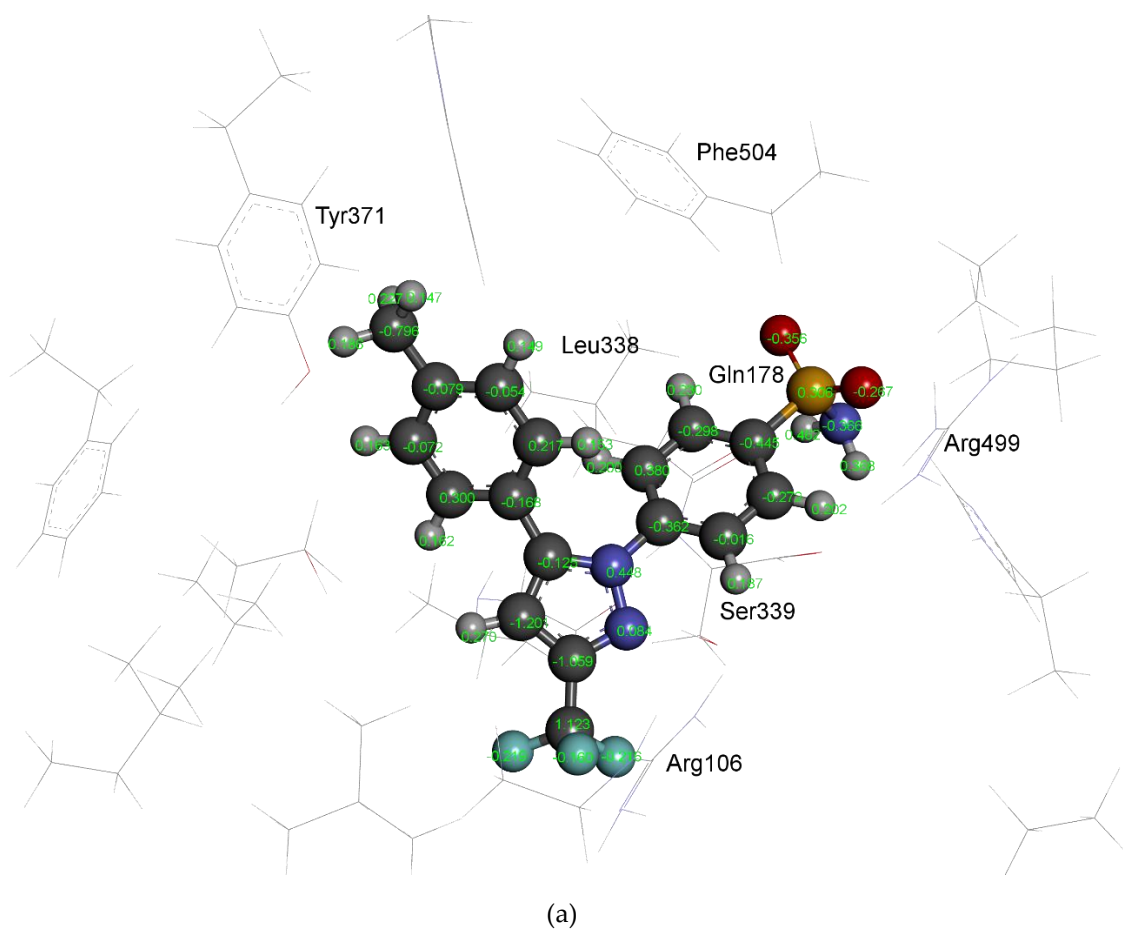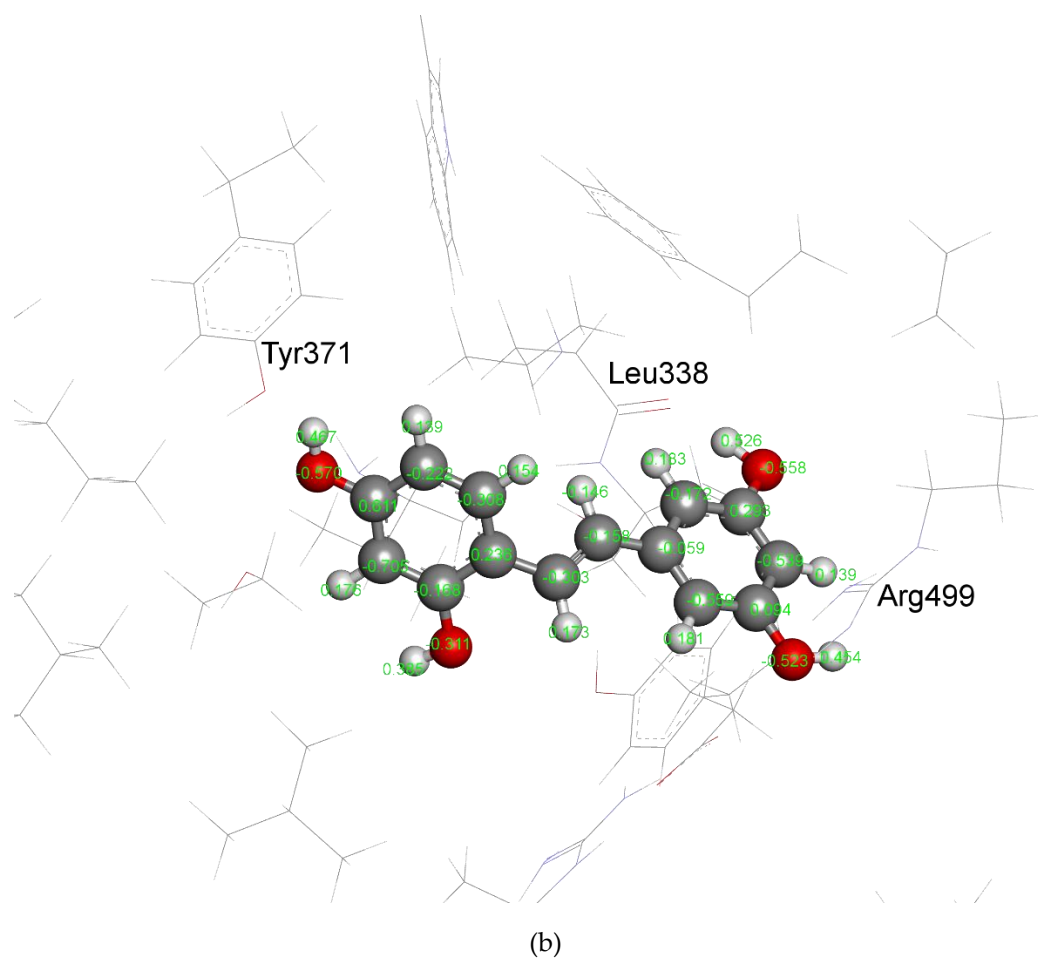



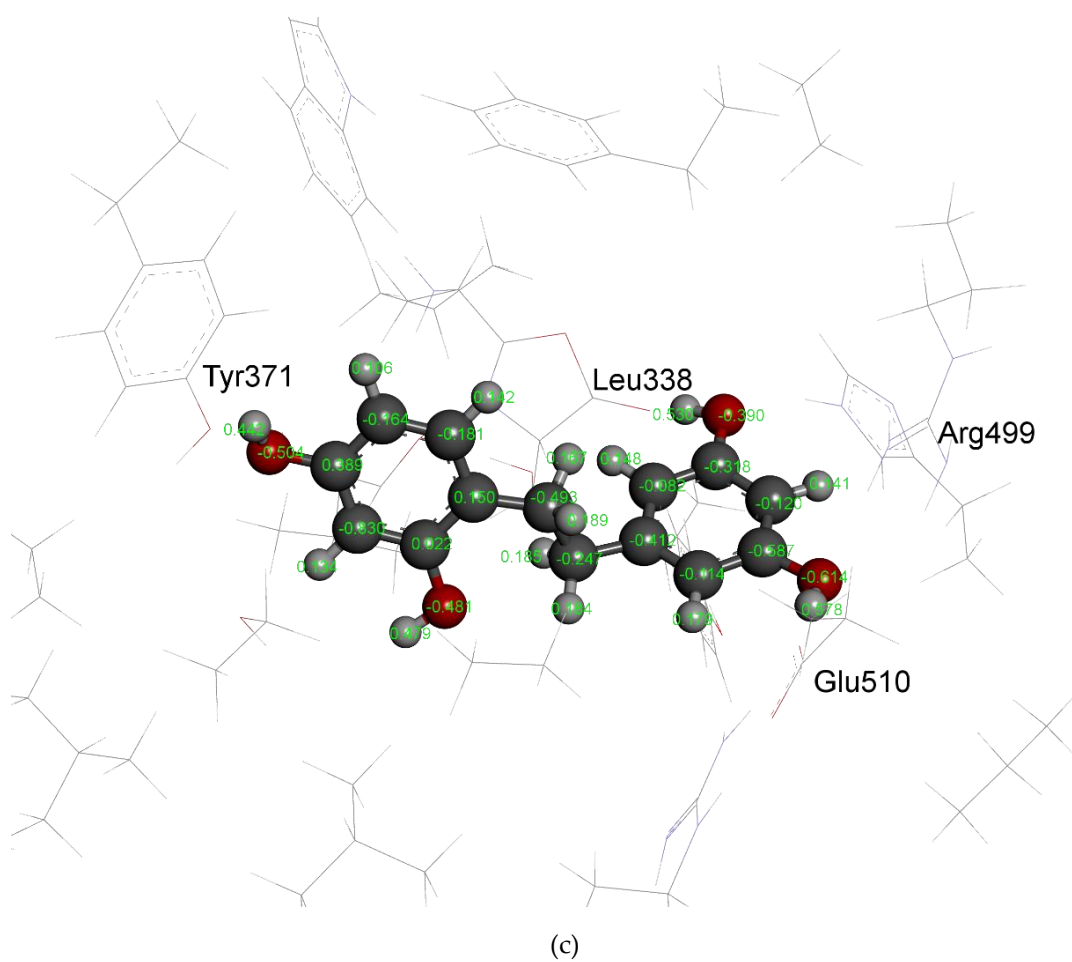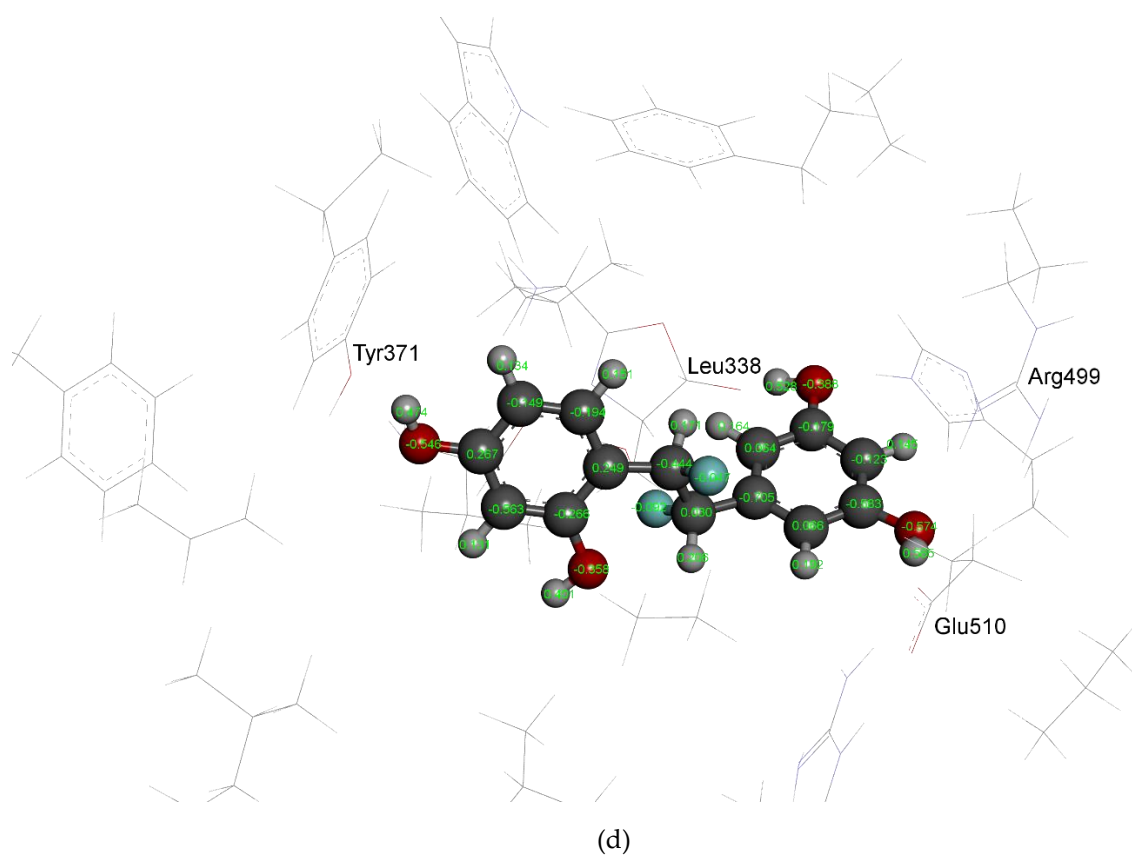

**Table S1.** Hydrophobic interactions of relaxed pose of celecoxib obtained from MD simulation in the catalytic pocket of COX-2.

| Residues | Distance (Å) | Interaction type |
|----------|--------------|------------------|
| Val335   | 4.47, 5.34   | Pi-Alkyl         |
| Val335   | 5.27         | Alkyl-Alkyl      |
| Leu338   | 5.38, 5.50   | Pi-Alkyl         |
| Ser339   | 2.26         | Pi-Sigma         |
| Tyr341   | 5.18         | Pi-Alkyl         |
| Leu370   | 5.15         | Alkyl-Alkyl      |
| Tyr371   | 4.57         | Pi-Alkyl         |
| Trp373   | 4.88         | Pi-Alkyl         |
| Val509   | 3.87         | Pi-Alkyl         |
| Ala513   | 3.99, 4.42   | Pi-Alkyl         |

**Table S2.** Dunnett t-test of docking scores.

| Compounds | Mean Difference | Significance | 95% Confidence Interval |
|-----------|-----------------|--------------|-------------------------|
|           |                 |              | Upper Bound             |
| 1         | -18.03          | 0.031        | -1.571                  |
| 2         | -20.65          | 0.013        | -4.191                  |
| 3         | -11.46          | 0.195        | 4.999                   |
| 4         | -16.08          | 0.056        | 0.376                   |
| 5         | -17.51          | 0.036        | -1.047                  |
| 6         | -4.85           | 0.633        | 11.613                  |
| 7         | -17.83          | 0.033        | -1.374                  |
| 8         | -17.72          | 0.034        | -1.261                  |
| 9         | -12.56          | 0.149        | 3.899                   |

Mean square error = 59.086; Standard error = 6.276

**Table S3** Dunnett t-test of QM interaction energy.

| Compounds | Mean Difference | Significance | 95% Confidence Interval |
|-----------|-----------------|--------------|-------------------------|
|           |                 |              | Upper Bound             |
| 1         | -5.502          | 0.151        | 1.652                   |
| 2         | 9.332           | 1.000        | 16.487                  |
| 3         | -6.468          | 0.081        | 0.687                   |
| 4         | -15.998         | 0.000        | -8.843                  |
| 5         | 6.308           | 1.000        | 13.462                  |
| 6         | -8.040          | 0.025        | -0.886                  |
| 7         | -17.248         | 0.000        | -10.093                 |
| 8         | 11.472          | 1.000        | 18.627                  |
| 9         | -7.138          | 0.051        | 0.017                   |

Mean square error = 15.730; Standard error = 2.804



### Characteristics of oxyresveratrol (1)

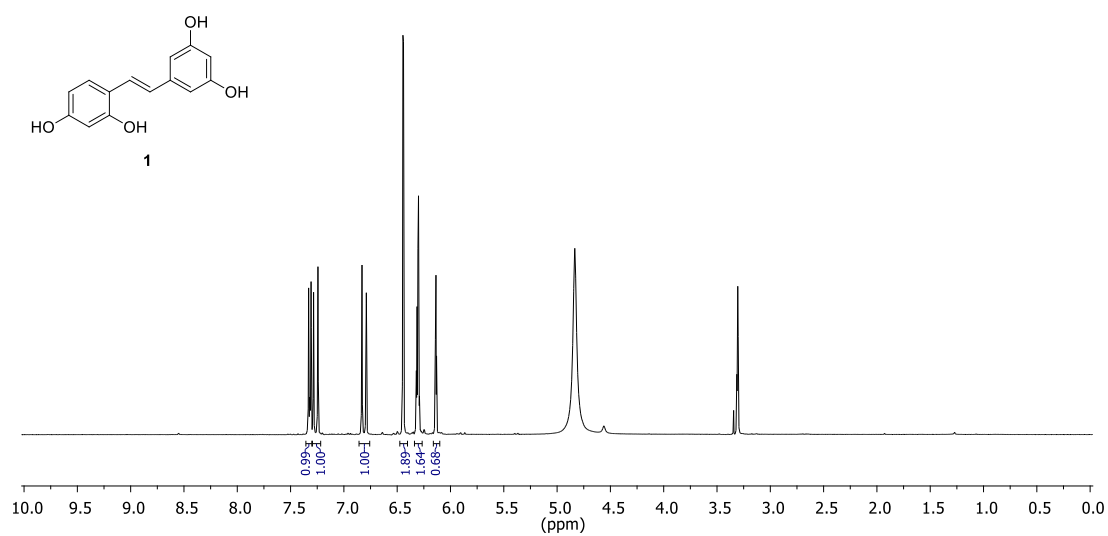

Figure S6 <sup>1</sup>H NMR (Methanol-*d*<sub>4</sub>, 400 MHz) of oxyresveratrol (1).

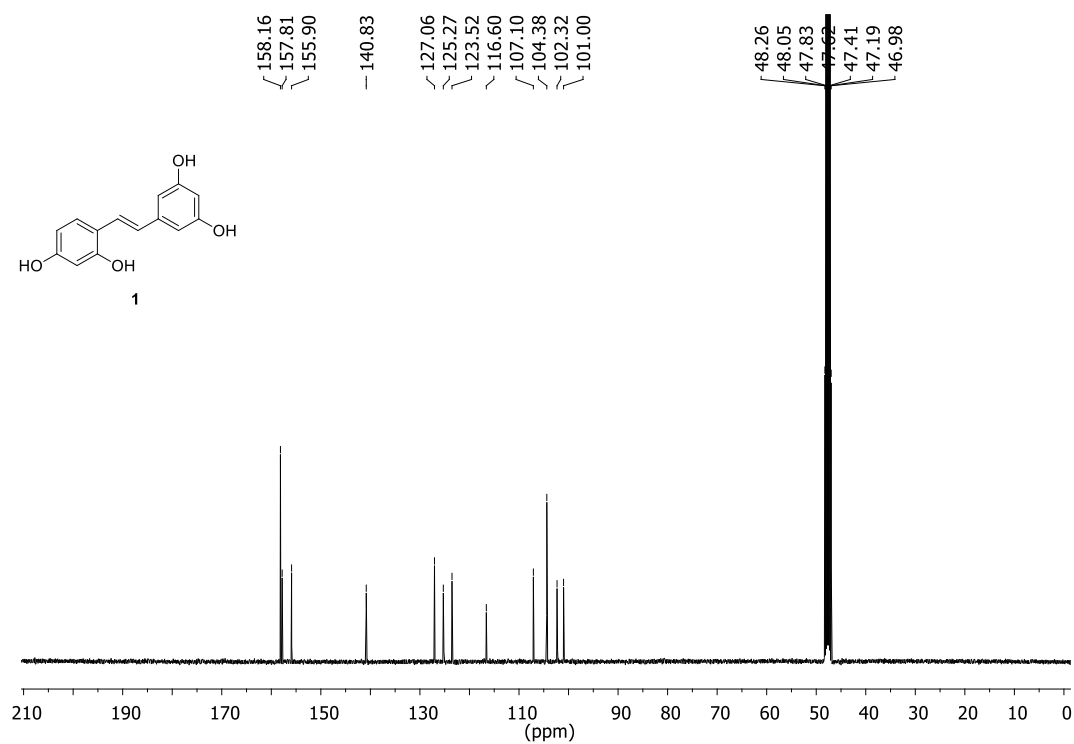

Figure S7 <sup>13</sup>C NMR (Methanol-*d*<sub>4</sub>, 100 MHz) of oxyresveratrol (1).

### Characteristics of 2,3',4,5'-tetramethoxystilbene (2)

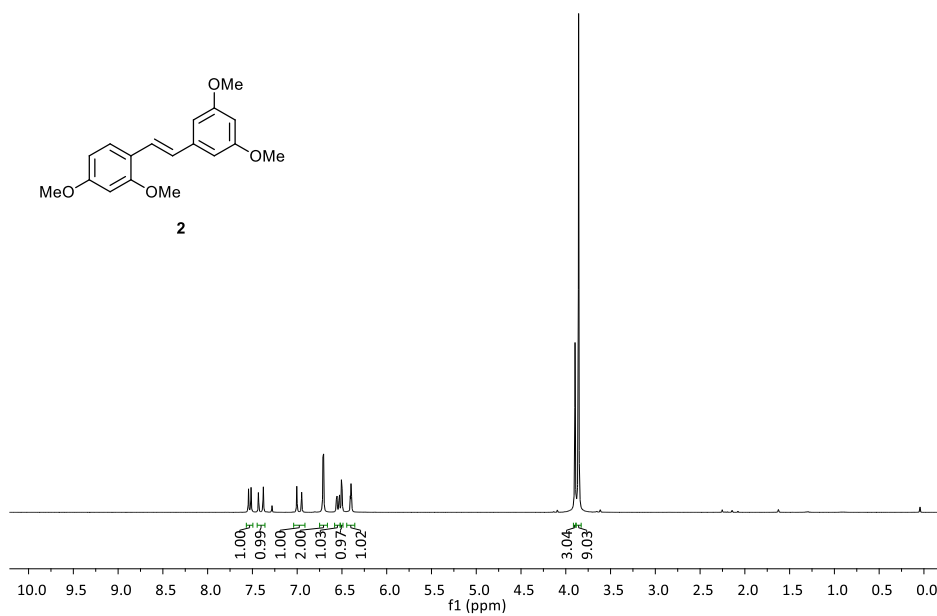

**Figure S8** <sup>1</sup>H NMR (CDCl<sub>3</sub>, 300 MHz) of 2,3',4,5'-tetramethoxystilbene (2).

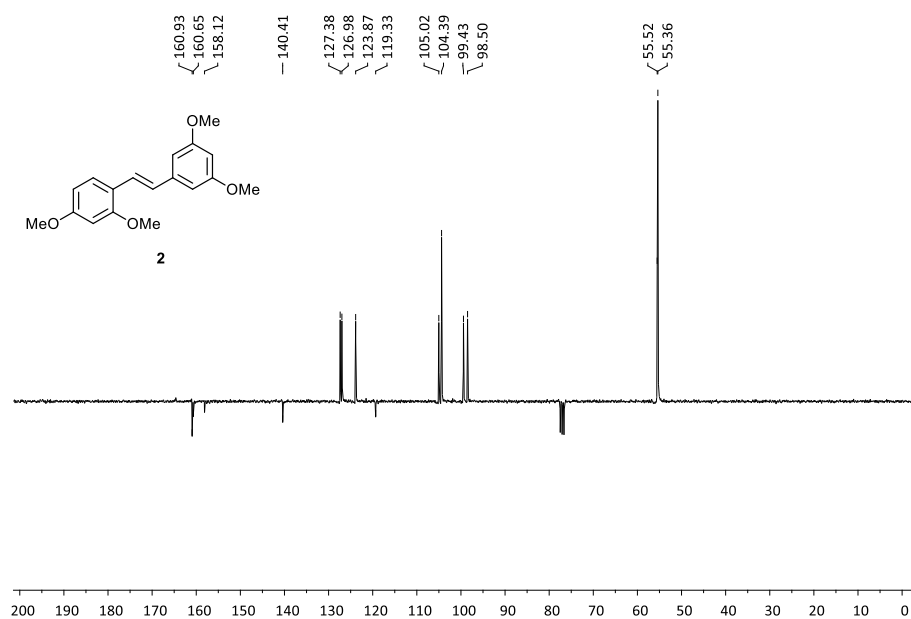

**Figure S9** <sup>13</sup>C NMR (CDCl<sub>3</sub>, 75 MHz) of 2,3',4,5'-tetramethoxystilbene (2).

### Characteristics of 2,3',4,5'-tetrahydroxybibenzyl (4)

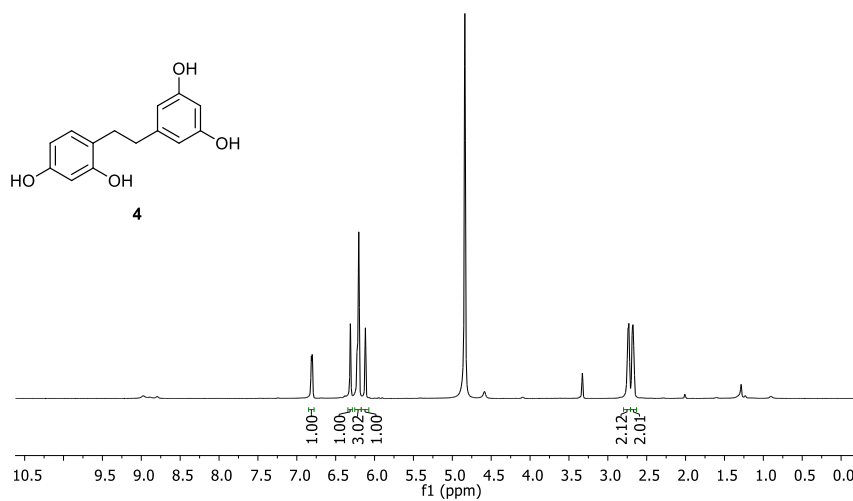

Figure S10 <sup>1</sup>H NMR (Methanol-*d*<sub>4</sub>, 600 MHz) of 2,3',4,5'-tetrahydroxybibenzyl (4).

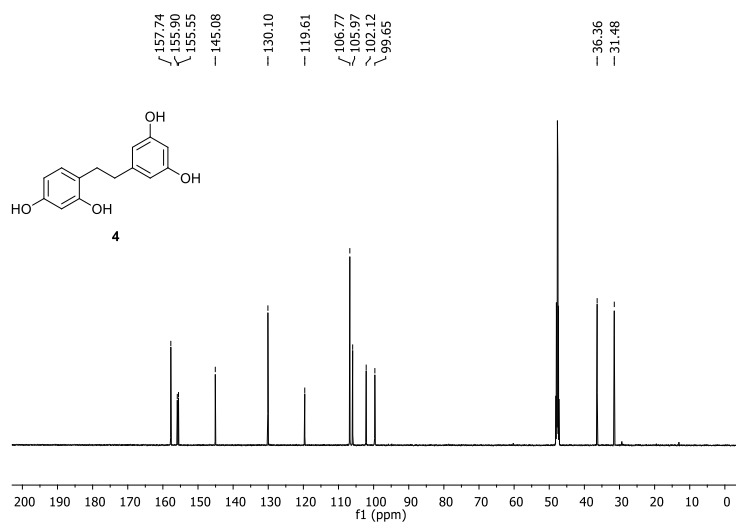

Figure S11 <sup>13</sup>C NMR (Methanol-*d*<sub>4</sub>, 150 MHz) of 2,3',4,5'-tetrahydroxybibenzyl (4).

### Characteristics of 2,3',4,5'-tetramethoxybibenzyl (5)

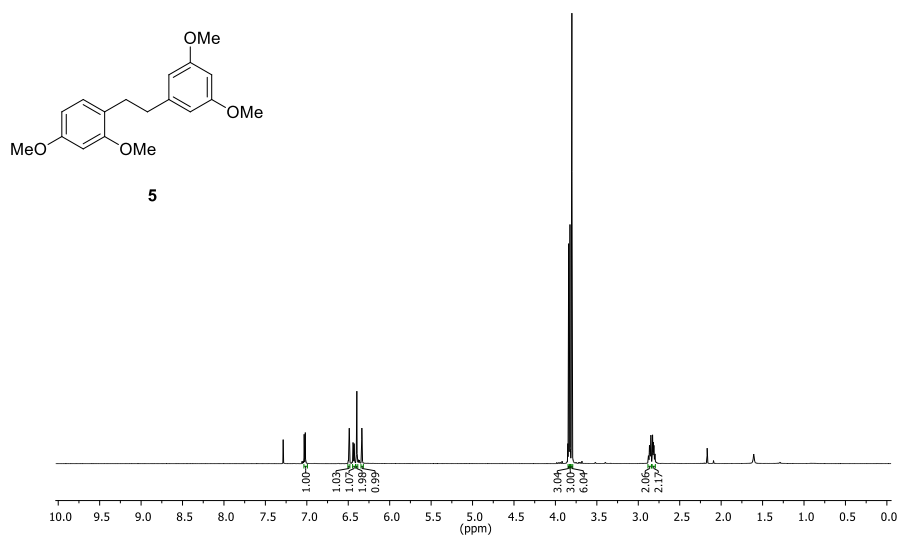

Figure S12 <sup>1</sup>H NMR (CDCl<sub>3</sub>, 600 MHz) of 2,3',4,5'-tetramethoxybibenzyl (5).

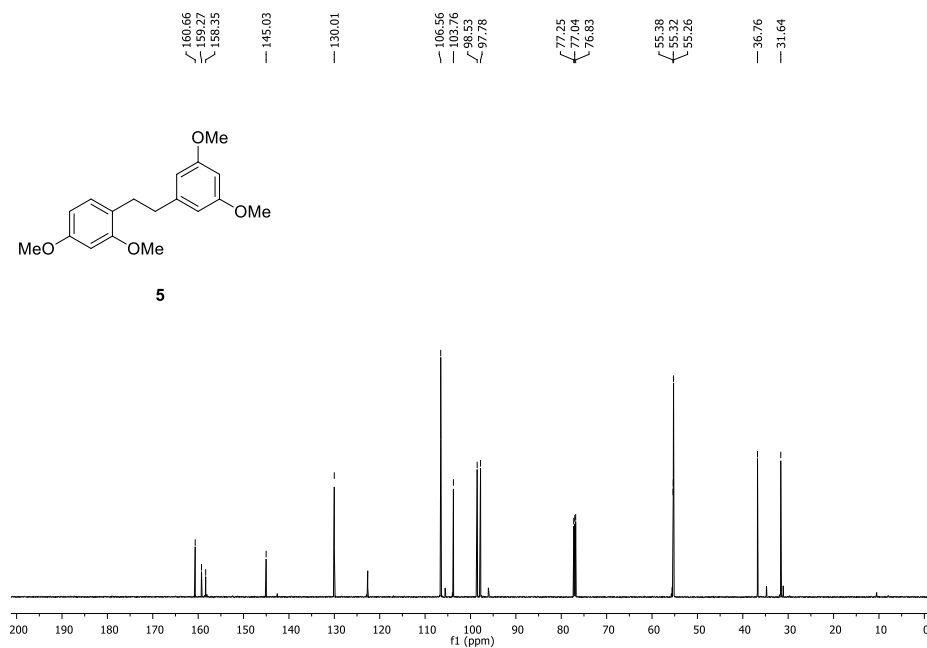

Figure S13 <sup>13</sup>C NMR (CDCl<sub>3</sub>, 150 MHz) of 2,3',4,5'-tetramethoxybibenzyl (5).

### Characteristics of 2,3',4,5'-tetraacetoxystilbene (3)

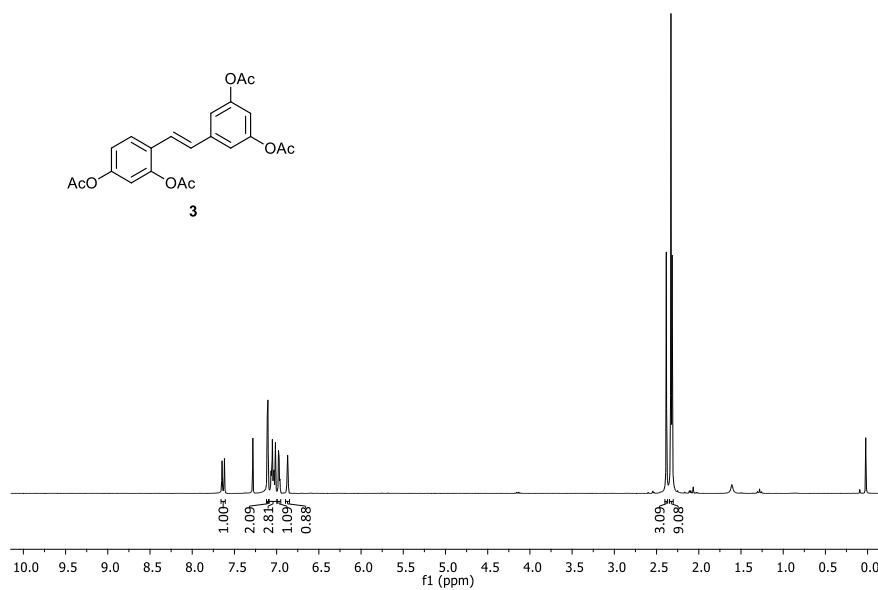

**Figure S14** <sup>1</sup>H NMR (CDCl<sub>3</sub>, 300 MHz) of 2,3',4,5'-tetraacetoxystilbene (3).

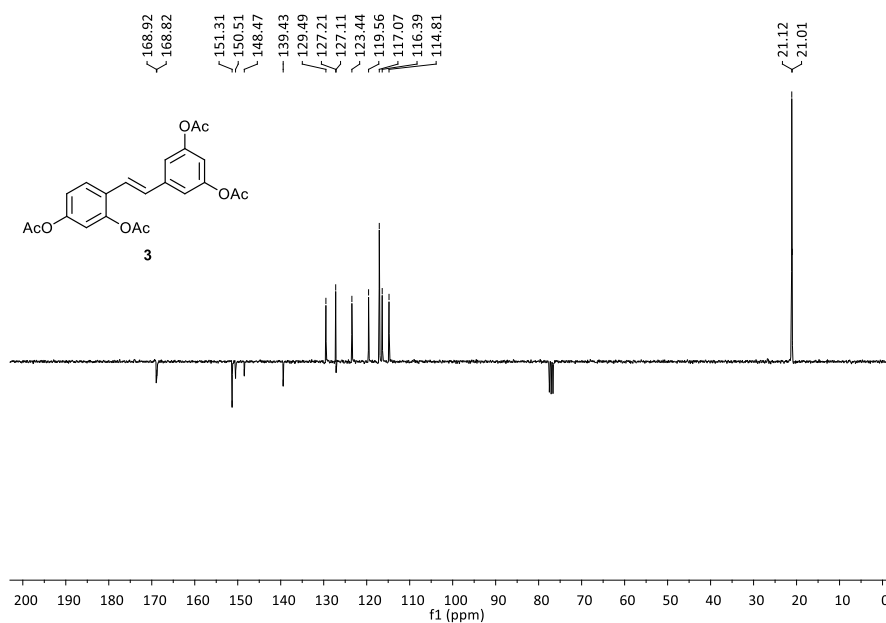

**Figure S15** <sup>13</sup>C NMR (CDCl<sub>3</sub>, 75 MHz) of 2,3',4,5'-tetraacetoxystilbene (3)

### Characteristics of 2,3',4,5'-tetraacetoxybibenzyl (6)

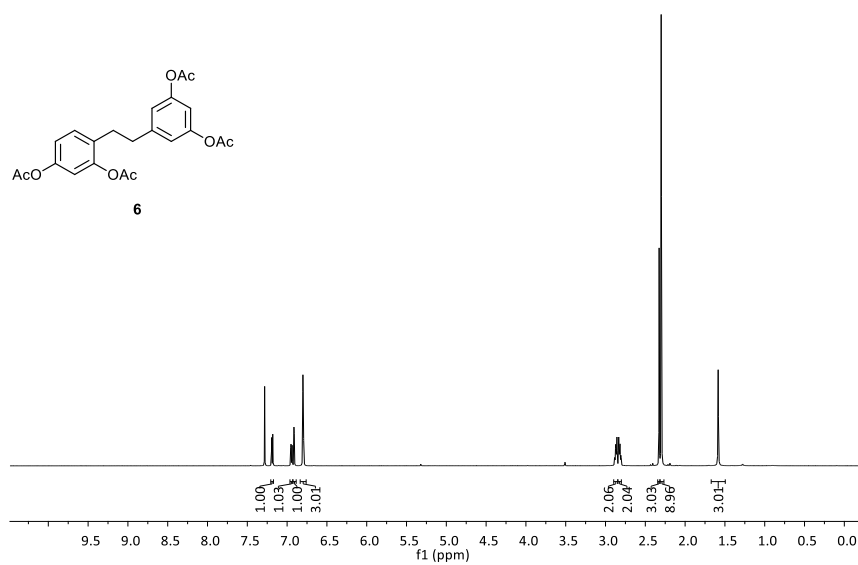

**Figure S16** <sup>1</sup>H NMR (CDCl<sub>3</sub>, 600 MHz) of 2,3',4,5'-tetraacetoxybibenzyl (6).

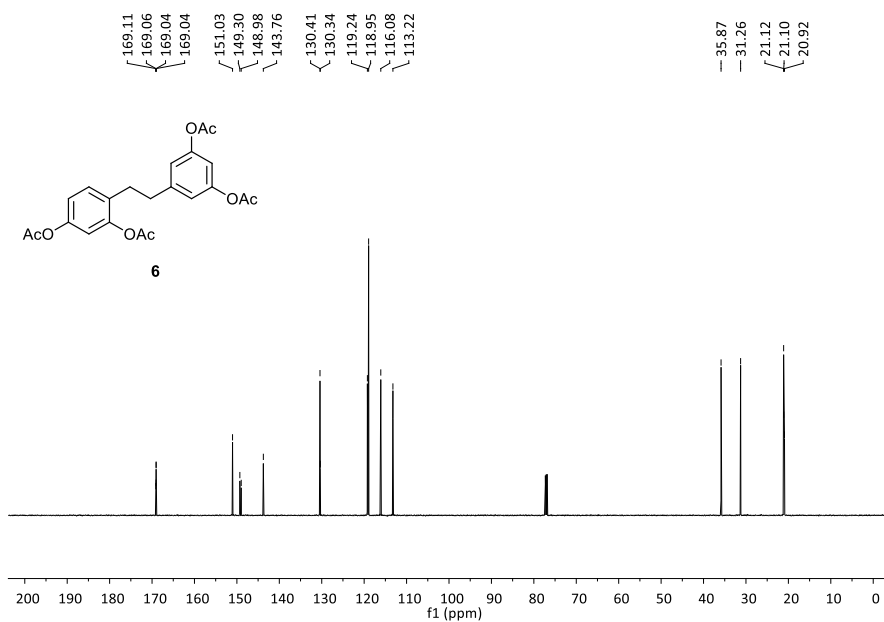

**Figure S17** <sup>13</sup>C NMR (CDCl<sub>3</sub>, 150 MHz) of 2,3',4,5'-tetraacetoxybibenzyl (6).
